# Supplementary material
Source: PubMed Central journal article supplement (PMC4660270)
Supplement: NIHMS728318-supplement-2.pdf [file NIHMS728318-supplement-2.pdf]

Figure S1. Sequence Alignment of the YAP-binding domain of TEAD from various species. (Related to Figure 1)

The amino acid residues lining the central pocket are indicated and shown in red. Note the high degree of conservation of these residues among various species. The # sign indicates the location of two residues mutated in TEAD dm.

#

TEAD2\_HUMAN RGLGTARLQLVEFSAFVEPPDAVDSYQRHLFVHISQHCPSPGAPPLESVDVRQIYDKFPE  
 TEAD4\_HUMAN RSVASSKLWMLEFSAFLEQQQDPDTYNKHLFVHIGQSSPSYSDPYLEAVDIRQIYDKFPE  
 TEAD2\_BOVINE RALGTARLQLVEFSAFVEPPDATDSYQRHLFVHISQHCPSPGAPPLESVDVRQIYDKFPE  
 TEAD2\_MOUSE RALGTARLQLIEFSAFVEPPDAVDSFQRHLFVHISQOCPSPGAPPLESVDVRQIYDKFPE  
 TEAD1\_DANRE RSIGTSKLRRLVEFSAFLEHQRPDLYNKHLFVHIGQTNYSYSDALLETVDIRQIYDKFPE  
 Sd\_DROME RAIATHKFRLLEFTAAMEIQRD-EIYHRHLFVQLGGK-PSFSDPPLLETVDIRQIFDKFPE  
 \* \* \* \*

TEAD2\_HUMAN KKGGLRELYDRGPPHAFFLVKFWADLNWGPSGEEAGAGGSISSGGFYGVSSQYESLEHMT  
 TEAD4\_HUMAN KKGGLKDLFERGPSNAFFLVKFWADLNTNIED-----EGSSFFYGVSSQYESPENMI  
 TEAD2\_BOVINE KKGGLRELYDRGPPHAFFLVKFWADLNWGPSGEEVGAGG--SSGGFYGVSSQYESLEHMT  
 TEAD2\_MOUSE KKGGLRELYDRGPPHAFFLVKFWADLNWGPSAEEAGSSG--GGGGFYGVSSQYESRELMT  
 TEAD1\_DANRE KKGGLKELFGKGPQNAFFLVKFWADLNCNIQED-----SGSFFYGVTSQYESSENMT  
 Sd\_DROME KSGGLKDLYEKGPQNAFYLVKCWADLNTDLTTGS-----ETGDFYGVTSQYESNENVV  
 \*

#

TEAD2\_HUMAN LTCSKVKCSFGKQVVEK VETERAQLEDGRFVYRLLRSPMCEYLVNFLHKLRLQLPERYMMN  
 TEAD4\_HUMAN ITCSTKVCSFGKQVVEK VETEYARYENGHYSYRIHRSPICEYMINFIHKLKHLPEKYMMN  
 TEAD2\_BOVINE LTCSKVKCSFGKQVVEK VETERAQLEDGRFVYRLLRSPMCEYLVNFLHKLRLQLPERYMMN  
 TEAD2\_MOUSE LTCSKVKCSFGKQVVEK VETERAQLEDGRFVYRLLRSPMCEYLVNFLHKLRLQLPERYMMN  
 TEAD1\_DANRE ITCSTKVCSFGKQVVEK VETEYARFENGRFVYKISRSPMCEYMINFIHKLKHLPEKYMMN  
 Sd\_DROME LVCSTIVCSFGKQVVEK VESEYSRLENNRYVYRIQRSPMCEYMINFIQKLKLNLPERYMMN  
 : \* \* \* \* : \* :

TEAD2\_HUMAN SVLENFTILQVVTNRDTQELLLCTAYVFEVSTSERGAQHHIYRLVRD  
 TEAD4\_HUMAN SVLENFTILQVVTNRDTQETLLCIAYVFEVSASEHGAQHHIYRLVKE  
 TEAD2\_BOVINE SVLENFTILQVVTNRDTQELLLCTAYVFEVSTSERGAQHHIYRLVRD  
 TEAD2\_MOUSE SVLENFTILQVVTNRDTQELLLCTAYVFEVSTSERGAQYHIYRLVRD  
 TEAD1\_DANRE SVLENFTILLVVSNNRETQETLLCMACVFEVSNSEHGAQHHIYRLVKD  
 Sd\_DROME SVLENFTILQVMRARETQETLLCIAYVFEVAAQNSGTTHHIYRLIKE  
 \* \* \*
